# Supplementary material
Source: publisher figshare collection journal article supplement (https://springernature.figshare.com/ndownloader/files/18098159)
Supplement: Supplementary file 1 [file 18098159]

**Table 1**. Methodological quality of KIF6 gene studies association included based on the Newcastle-Ottawa scale

| **Reference** | **Selection** | **Comparability** | **Exposure** | **Total score** |
| --- | --- | --- | --- | --- |
| Berglund, G.[[17](#_ENREF_17)] |  |  |  | 6 |
| Vartiainen, E. [[18](#_ENREF_18)] |  |  |  | 8 |
| Senti, M.[[19](#_ENREF_19)] |  |  |  | 6 |
| Yusuf, S.[[20](#_ENREF_20)] |  |  |  | 7 |
| Low, A. F.[[21](#_ENREF_21)] |  |  |  | 6 |
| Helgadottir, A.[[22](#_ENREF_22)] |  |  |  | 7 |
| Samani, N. J.[[23](#_ENREF_23)] |  |  |  | 6 |
| Meng, W.[[24](#_ENREF_24)] |  |  |  | 7 |
| Iakoubova, O.[[12](#_ENREF_12)] |  |  |  | 6 |
| Meiner, V.[[25](#_ENREF_25)] |  |  |  | 7 |
| Serre, D.[[26](#_ENREF_26)] |  |  |  | 6 |
| Morgan, T. M.[[27](#_ENREF_27)] |  |  |  | 8 |
| Assimes, T. L.[[28](#_ENREF_28)] |  |  |  | 7 |
| Vennemann, M. M.[[29](#_ENREF_29)] |  |  |  | 7 |
| Sutton, B. S.[[30](#_ENREF_30)] |  |  |  | 6 |
| Martinelli, W.[[31](#_ENREF_31)] |  |  |  | 6 |
| Herrera-Galeano, J. E.[[32](#_ENREF_32)] |  |  |  | 6 |
| Stewart, A. F.[[33](#_ENREF_33)] |  |  |  | 7 |
| Luke, M. M.[[34](#_ENREF_34)] |  |  |  | 6 |
| Bare, L. A.[[15](#_ENREF_15)] |  |  |  | 8 |
| Wu, G.[[16](#_ENREF_16)] |  |  |  | 6 |
| Peng, P.[[14](#_ENREF_14)] |  |  |  | 7 |
| Wu, G.[[35](#_ENREF_35)] |  |  |  | 7 |

**Table 2.** Summary finding of studies association between KIF6 gene and CHD.

| **Reference** | **OR (CI 95%)** | **Number of patients (studies)** | **Design** | **Quality evidence (GRADE)** | **Publication bias** |
| --- | --- | --- | --- | --- | --- |
| Berglund, G.[[17](#_ENREF_17)] | 0.91 (0.59-1.38) | 86 | Case-control | ⊕⊕⊕○  Moderate | Undetected |
| Vartiainen, E. [[18](#_ENREF_18)] | 1.08 (0.79-1.48) | 167 | Case-control | ⊕⊕⊕○  Moderate | Undetected |
| Senti, M.[[19](#_ENREF_19)] | 1.03 (0.82-1.31) | 312 | Case-control | ⊕⊕⊕○  Moderate | Undetected |
| Yusuf, S.[[20](#_ENREF_20)] | 1.00 (0.89-1.13) | 1092 | Case-control | ⊕⊕⊕○  Moderate | Undetected |
| Low, A. F.[[21](#_ENREF_21)] | 1.02 (0.77-1.34) | 204 | Case-control | ⊕⊕⊕⊕  High | Undetected |
| Helgadottir, A.[[22](#_ENREF_22)] | 0.93 (0.79-1.11) | 875 | Case-control | ⊕⊕⊕○  Moderate | Undetected |
| Samani, N. J.[[23](#_ENREF_23)] | 1.04 (0.92-1.17) | 1126 | Case-control | ⊕⊕⊕○  Moderate | Undetected |
| Meng, W.[[24](#_ENREF_24)] | 0.99 (0.83-1.18) | 482 | Case-control | ⊕⊕⊕○  Moderate | Undetected |
| Iakoubova, O.[[12](#_ENREF_12)] | 1.33 (1.07-1.65) | 276 | Case-control | ⊕⊕⊕○  Moderate | Undetected |
| Meiner, V.[[25](#_ENREF_25)] | 1.10 (0.92-1.31) | 505 | Case-control | ⊕⊕⊕○  Moderate | Undetected |
| Serre, D.[[26](#_ENREF_26)] | 1.03 (0.89-1.19) | 789 | Case-control | ⊕⊕⊕○  Moderate | Undetected |
| Morgan, T. M.[[27](#_ENREF_27)] | 1.03 (0.88-1.20) | 807 | Case-control | ⊕⊕⊕○  Moderate | Undetected |
| Assimes, T. L.[[28](#_ENREF_28)] | 0.73 (0.60-0.88) | 505 | Case-control | ⊕⊕⊕○  Moderate | Undetected |
| Vennemann, M. M.[[29](#_ENREF_29)] | 0.94 (0.83-1.08) | 793 | Case-control | ⊕⊕⊕⊕  High | Undetected |
| Sutton, B. S.[[30](#_ENREF_30)] | 1.02 (0.89-1.16) | 1575 | Case-control | ⊕⊕⊕⊕  High | Undetected |
| Martinelli, W.[[31](#_ENREF_31)] | 1.02 (0.86-1.21) | 1106 | Case-control | ⊕⊕⊕○  Moderate | Undetected |
| Herrera-Galeano, J. E.[[32](#_ENREF_32)] | 1.01 (0.84-1.21) | 378 | Case-control | ⊕⊕⊕○  Moderate | Undetected |
| Stewart, A. F.[[33](#_ENREF_33)] | 1.03 (0.93-1.15) | 1540 | Case-control | ⊕⊕⊕⊕  High | Undetected |
| Luke, M. M.[[34](#_ENREF_34)] | 0.89 (0.75-1.04) | 505 | Case-control | ⊕⊕⊕○  Moderate | Undetected |
| Bare, L. A.[[15](#_ENREF_15)] | 1.03 (0.94-1.13) | 1987 | Case-control | ⊕⊕⊕○  Moderate | Undetected |
| Wu, G.[[16](#_ENREF_16)] | 1.03 (0.86-1.25) | 356 | Case-control | ⊕⊕⊕○  Moderate | Undetected |
| Peng, P.[[14](#_ENREF_14)] | 1.08 (0.88-1.33) | 289 | Case-control | ⊕⊕⊕○  Moderate | Undetected |
| Wu, G.[[35](#_ENREF_35)] | 1.12 (0.90-1.40) | 288 | Case-control | ⊕⊕⊕○  Moderate | Undetected |
